# Supplementary material
Source: PubMed Central journal article supplement (PMC3160096)
Supplement: supp_138.18.4013_DEV059568TableS1.pdf [file supp_138.18.4013_DEV059568TableS1.pdf]

**Table S1. Quantification of western blots**

| Panel                      | Bands   | Fold increase ( <i>tk27</i> /wild type) |
|----------------------------|---------|-----------------------------------------|
| Left ( $\alpha$ VAB-10A)   | VAB-10A | 0.97                                    |
| Middle ( $\alpha$ VAB-10B) | VAB-10B | 0.42                                    |
| Right ( $\alpha$ VAB-10N)  | VAB-10B | 0.004                                   |
|                            | VAB-10A | 0.117                                   |

The VAB-10 protein levels on western blots (in Fig. 1D) were measured by Image J software. The intensity of each band was normalized to that of the actin band. The increase of band intensity in *tk27* relative to that in wild type was calculated.
