# Supplementary material
Source: PubMed Central journal article supplement (PMC3160096)
Supplement: supp_138.18.4013_DEV059568TableS2.pdf [file supp_138.18.4013_DEV059568TableS2.pdf]

**Table S2. DTC turns and nuclear translocation in the *unc-6* mutant background**

| Genotype                          | Turn direction |         |         | Total |
|-----------------------------------|----------------|---------|---------|-------|
|                                   | Dorsal         | Ventral | Lateral |       |
| Wild type                         | 82 (82)        | 0       | 0       | 82    |
| <i>unc-6(ev400)</i>               | 39 (39)        | 4 (4)   | 49 (49) | 92    |
| <i>vab-10(tk27); unc-6(ev400)</i> | 33 (4)         | 15 (0)  | 34 (5)  | 82    |

Using Nomarski microscopy, we scored the direction of the first turn made by individual DTCs. The number of DTCs with nuclei at the leading edge is indicated in parentheses.
