# Supplementary material
Source: PubMed Central journal article supplement (PMC3160096)
Supplement: supp_138.18.4013_DEV059568TableS3.pdf [file supp_138.18.4013_DEV059568TableS3.pdf]

**Table S3. Mean number of comets in wild-type and *vab-10(tk27)* DTCs**

| Genotype            |       | Mean number of comets |               |                  |
|---------------------|-------|-----------------------|---------------|------------------|
|                     |       | Ventral migration     | Dorsal turn   | Dorsal migration |
| Wild type           | Front | 5.46±1.49             | 5.19±1.65     | 5.61±1.66        |
|                     | Rear  | 6.31±1.54             | 6.16±1.48     | 5.48±1.64        |
| <i>vab-10(tk27)</i> | Front | 2.49±1.44**           | 2.52±1.24**   | 1.97±1.33 **     |
|                     | Rear  | 5.42±1.35 (ns)        | 5.38±1.5 (ns) | 5.93±1.58 (ns)   |

The number of comets in a 20  $\mu\text{m}^2$  circle within each frame was counted using Morphometry Analysis of Metamorph (Molecular Devices). For each experiment,  $n=100$  (25 frames  $\times$  four DTCs). Results are shown as the mean $\pm$ s.d.

\*\* , significant difference ( $P<0.01$ ) relative to the front region of wild-type DTCs based on Student's *t*-test.

ns, the difference is not significant ( $P>0.05$ ).
