# Supplementary material
Source: PubMed Central journal article supplement (PMC3160096)

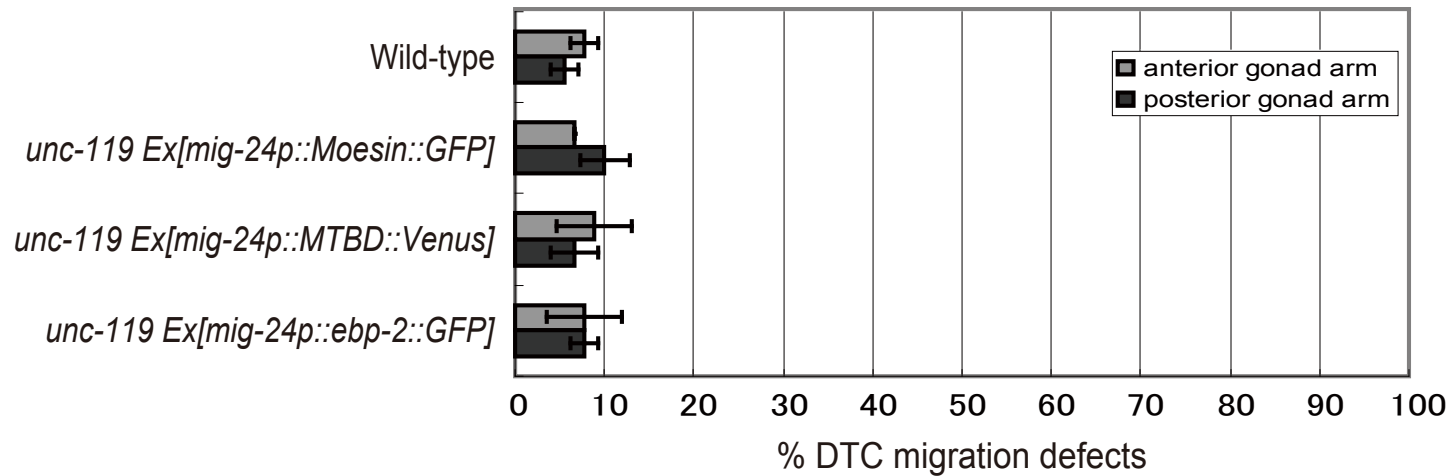

Supplement: supp_138.18.4013_DEV059568FigS1.pdf [file supp_138.18.4013_DEV059568FigS1.pdf]

**A**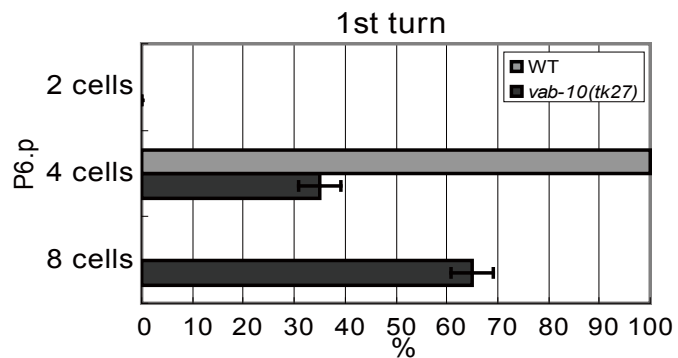**B**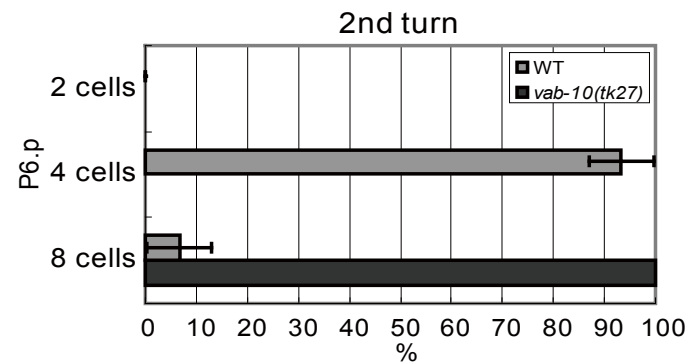**C**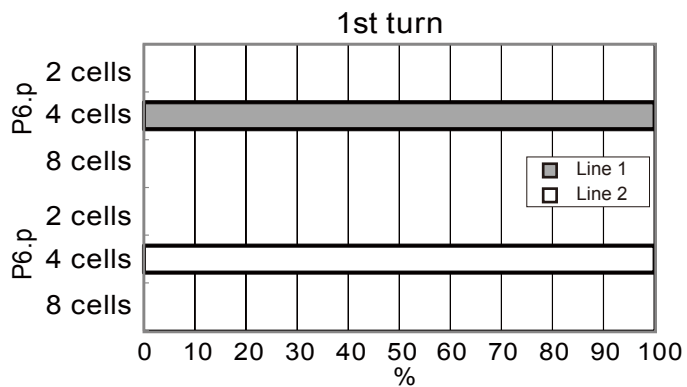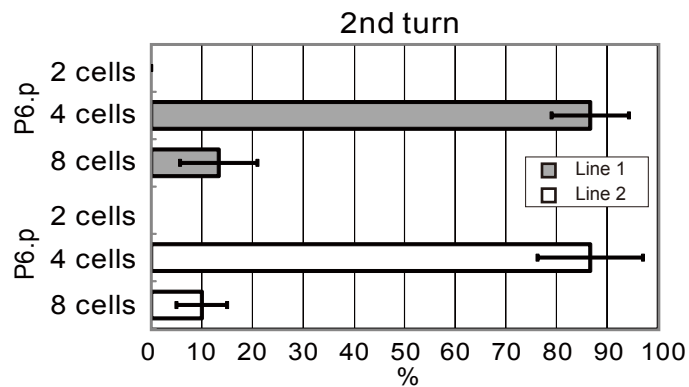

Supplement: supp_138.18.4013_DEV059568FigS2.pdf [file supp_138.18.4013_DEV059568FigS2.pdf]

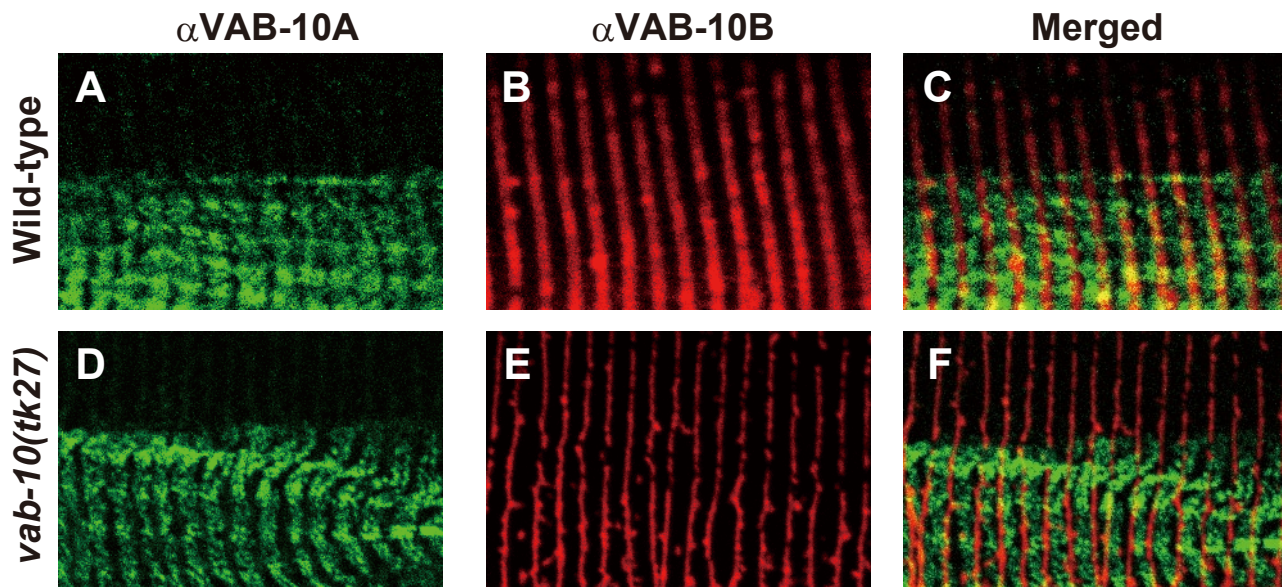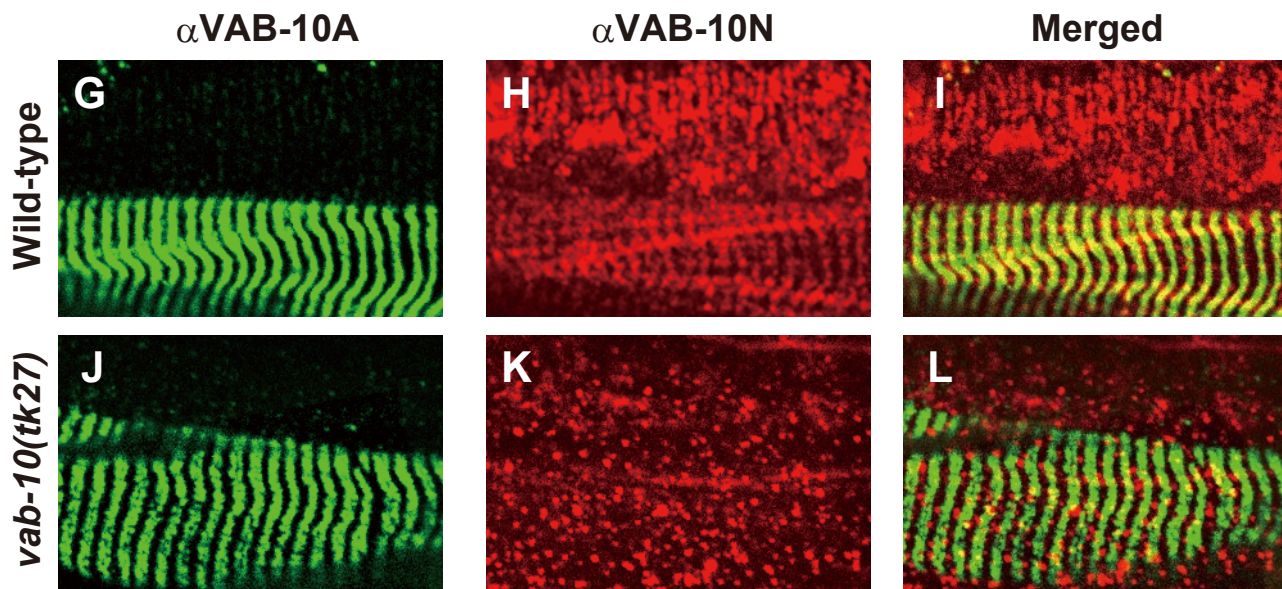

Supplement: supp_138.18.4013_DEV059568FigS3.pdf [file supp_138.18.4013_DEV059568FigS3.pdf]

**A**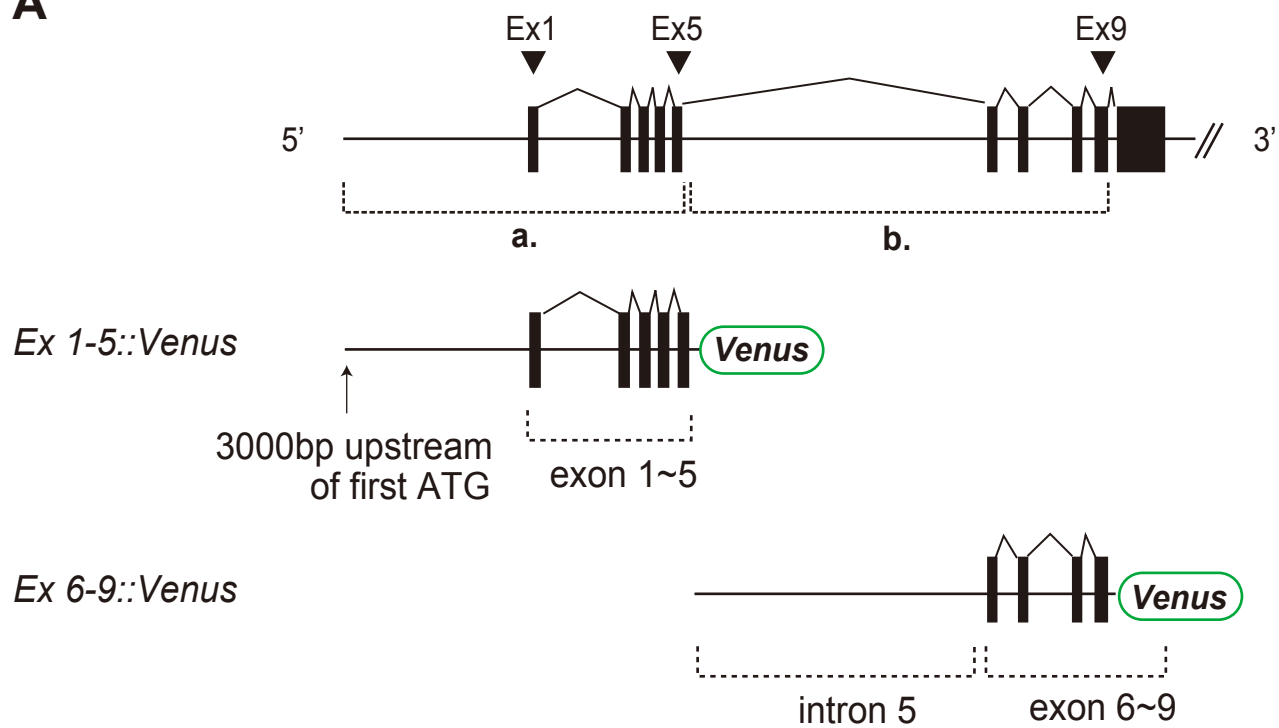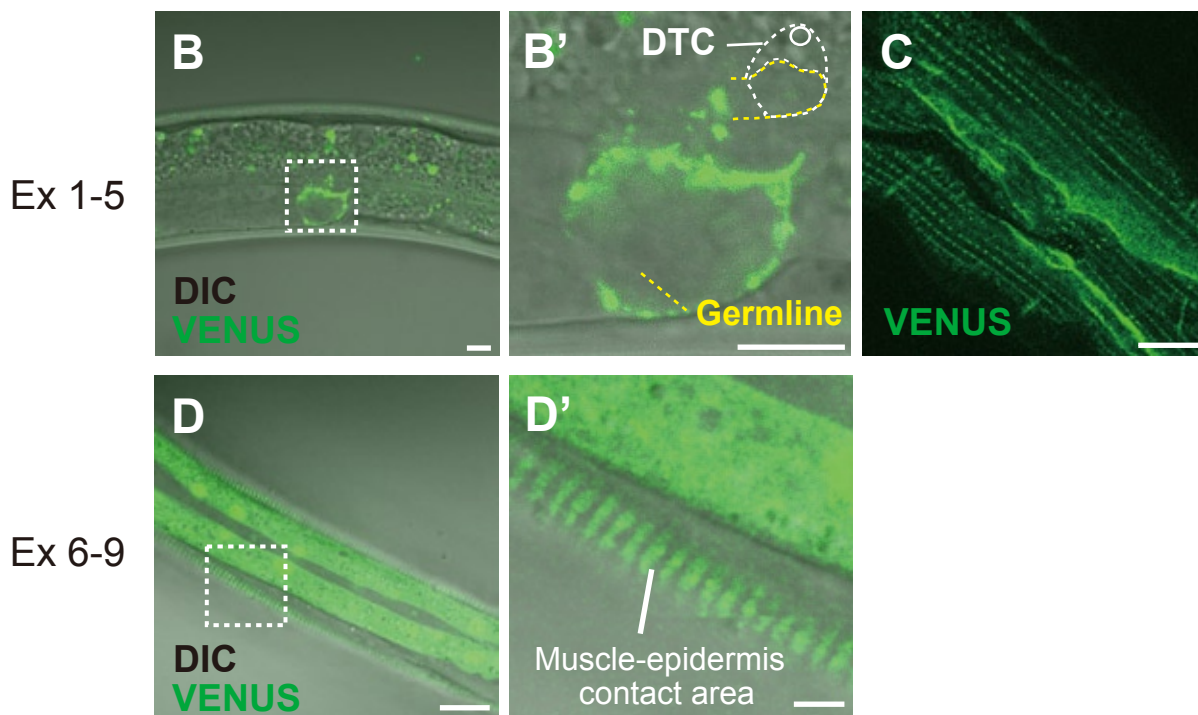

Supplement: supp_138.18.4013_DEV059568FigS4.pdf [file supp_138.18.4013_DEV059568FigS4.pdf]

VAB-10

LIN-26, left side

LIN-26, right side

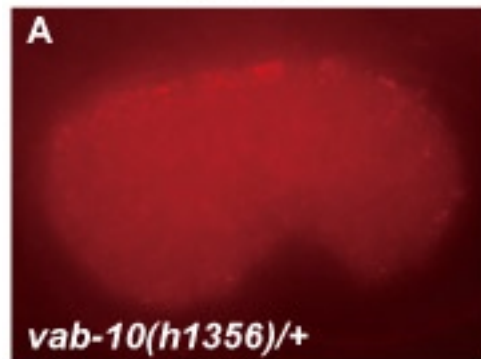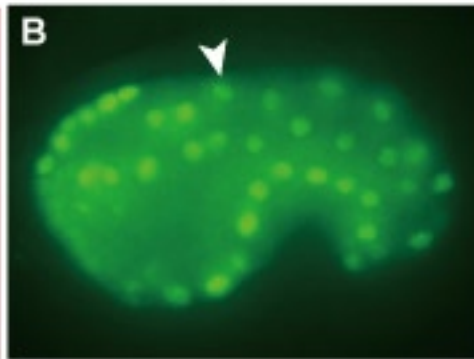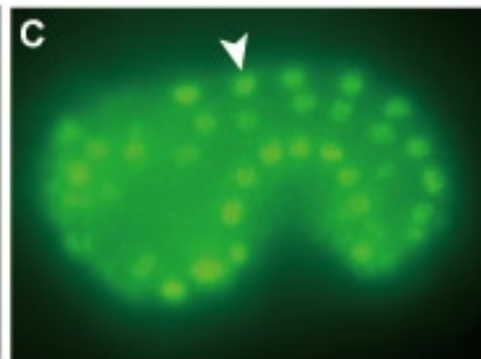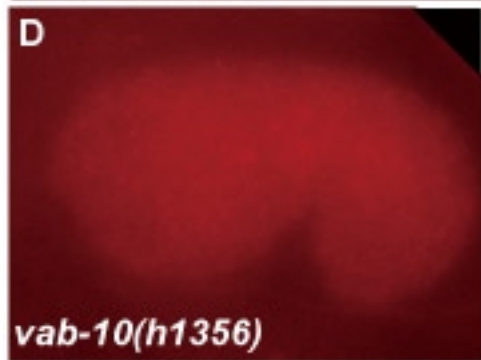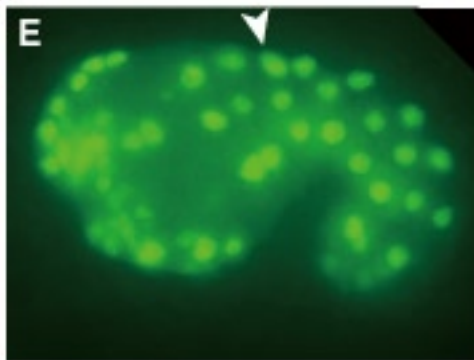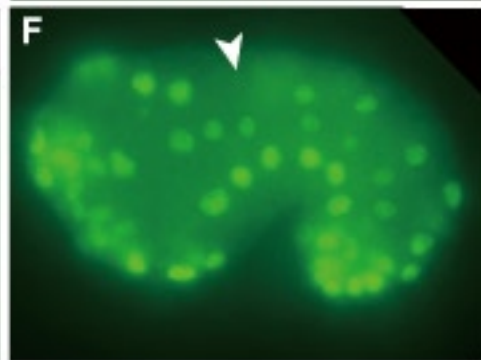

Supplement: supp_138.18.4013_DEV059568FigS5.pdf [file supp_138.18.4013_DEV059568FigS5.pdf]

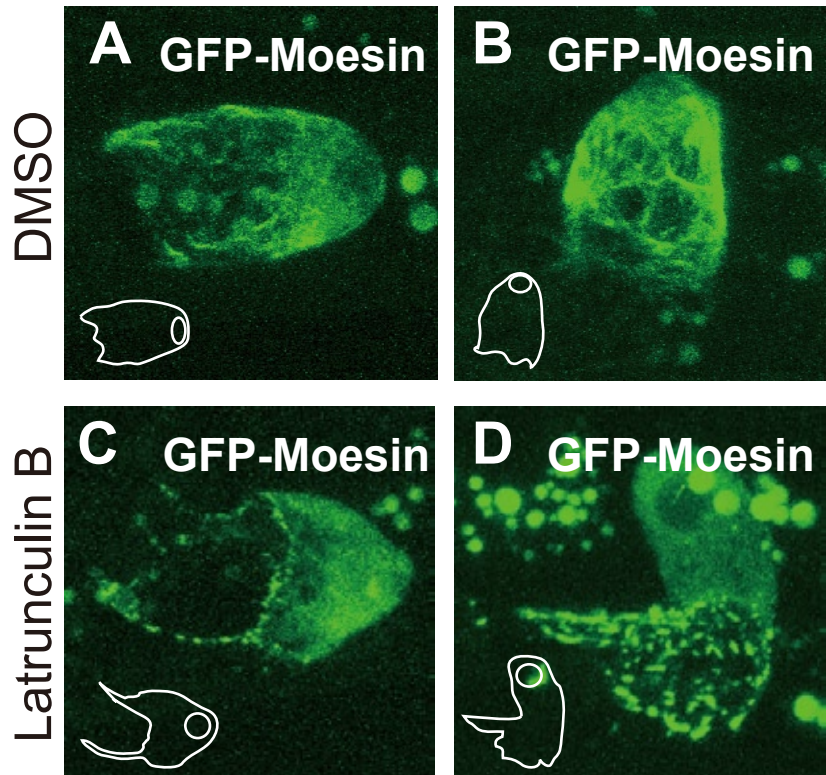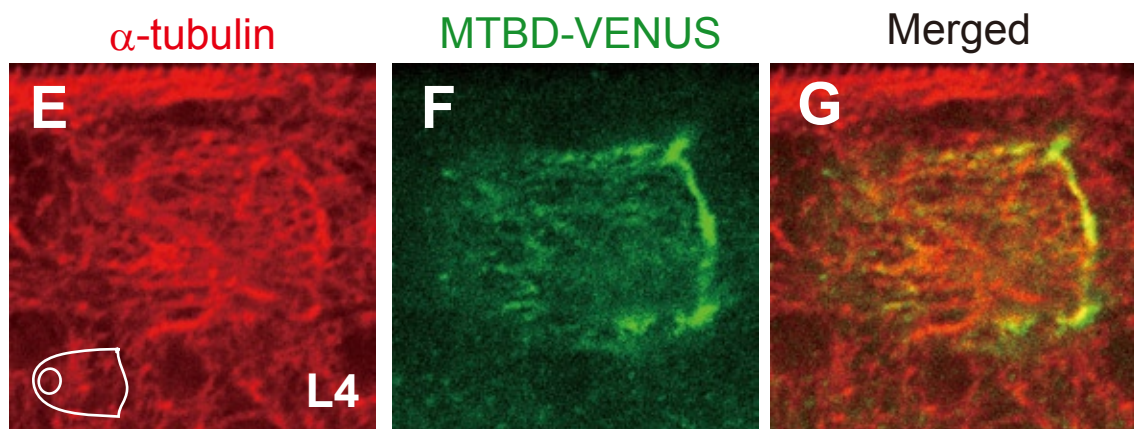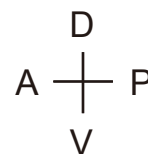

Supplement: supp_138.18.4013_DEV059568FigS6.pdf [file supp_138.18.4013_DEV059568FigS6.pdf]

**Wild-type**

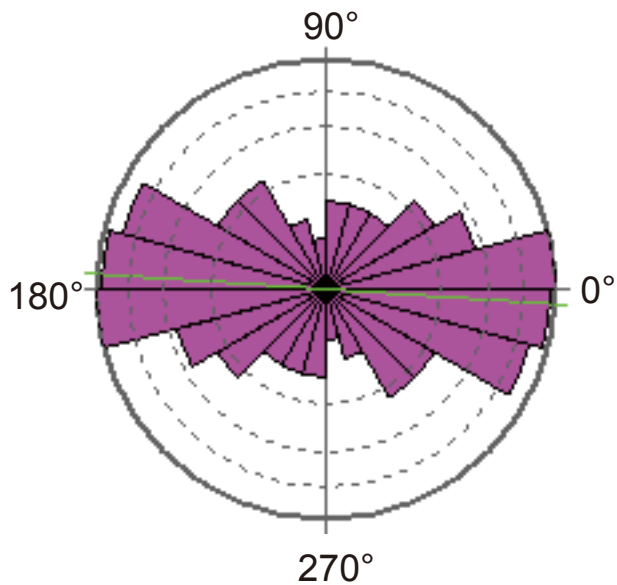

***vab-10(tk27)***

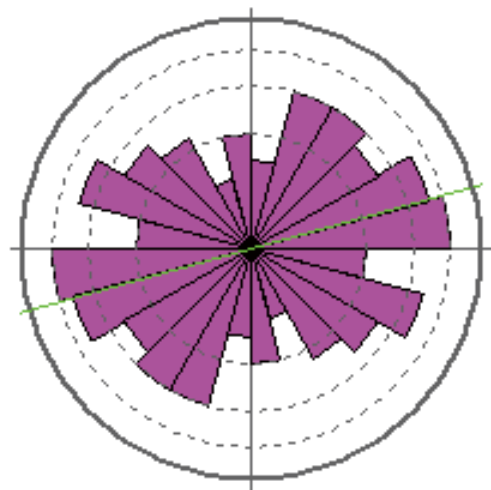

Supplement: supp_138.18.4013_DEV059568FigS7.pdf [file supp_138.18.4013_DEV059568FigS7.pdf]
